# Supplementary material for: Voluntary resistance wheel exercise from mid-life prevents sarcopenia and increases markers of mitochondrial function and autophagy in muscles of old male and female C57BL/6J mice
Source: PubMed Central journal article supplement (PMC5155391; doi:10.1186/s13395-016-0117-3), 2016-12-13

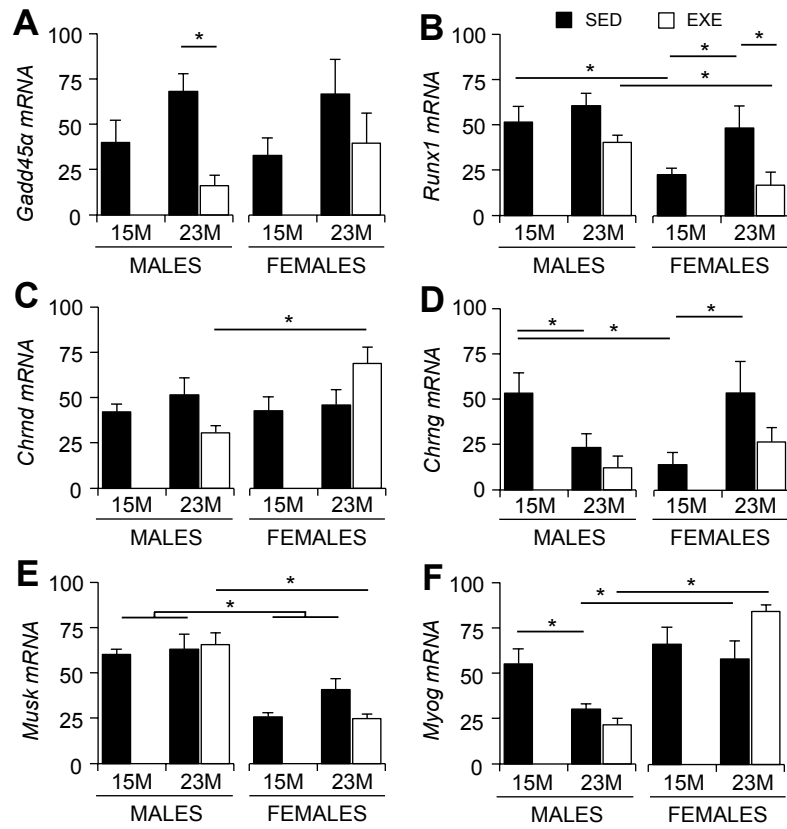

Supplement: 13395_2016_117_MOESM2_ESM.pdf [file 13395_2016_117_MOESM2_ESM.pdf]
